# Supplementary material for: Nanoparticle Delivery in Microvascular after Cerebral Ischemia: A Simulation Study
Source: Hindawi journal article supplement (doi:10.1155/2024/6637846), 2024-02-07
Supplement: f1 [file 6637846.f1.docx]

Supplemental Material

# Supplemental Tables

Supplemental Table 1 The total amount of binding NPs with different sizes in three models

|  | Mean | 𝑃 Value |
| --- | --- | --- |
| 20nm |  |  |
| Normal vs. Stenosis | 5687vs.5732 | 0.9544 |
| Normal vs. Occlusion | 5687vs.5399 | ＜0.0001 |
| Stenosis vs. Occlusion | 5732vs.5399 | ＜0.0001 |
| 50nm |  |  |
| Normal vs. Stenosis | 4505vs.4549 | 0.9544 |
| Normal vs. Occlusion | 4505vs.4293 | ＜0.0001 |
| Stenosis vs. Occlusion | 4549vs.4293 | ＜0.0001 |
| 100nm |  |  |
| Normal vs. Stenosis | 3628vs.3721 | 0.0825 |
| Normal vs. Occlusion | 3628vs.3530 | 0.0527 |
| Stenosis vs. Occlusion | 3721vs.3530 | ＜0.0001 |
| 200nm |  |  |
| Normal vs. Stenosis | 2934vs.2969 | 0.9951 |
| Normal vs. Occlusion | 2934vs.2962 | 0.9996 |
| Stenosis vs. Occlusion | 2969vs.2962 | ＞0.9999 |
| 500nm |  |  |
| Normal vs. Stenosis | 2105vs.2202 | 0.0560 |
| Normal vs. Occlusion | 2105vs.2324 | ＜0.0001 |
| Stenosis vs. Occlusion | 2202vs.2324 | 0.0047 |
| 1000nm |  |  |
| Normal vs. Stenosis | 1666vs.1770 | 0.0308 |
| Normal vs. Occlusion | 1666vs.1980 | ＜0.0001 |
| Stenosis vs. Occlusion | 1770vs.1980 | ＜0.0001 |

The numbers in the column of Mean are the average number of NP binding.

Supplemental Table 2 The total amount of binding NPs with different densities in three models

|  | Mean | 𝑃 Value |
| --- | --- | --- |
| AuNP |  |  |
| Normal vs. Stenosis | 3633vs.3707 | 0.0882 |
| Normal vs. Occlusion | 3633vs.3569 | 0.6869 |
| Stenosis vs. Occlusion | 3707vs.3569 | 0.1433 |
| Fe3O4NP |  |  |
| Normal vs. Stenosis | 3628vs.3721 | 0.5499 |
| Normal vs. Occlusion | 3628vs.3530 | 0.4472 |
| Stenosis vs. Occlusion | 3721vs.3530 | 0.1747 |
| SiO2NP |  |  |
| Normal vs. Stenosis | 3687vs.3735 | 0.2908 |
| Normal vs. Occlusion | 3687vs.3527 | 0.0700 |
| Stenosis vs. Occlusion | 3735vs.3527 | 0.0141 |
| PLGANP |  |  |
| Normal vs. Stenosis | 3670vs.3697 | 0.9783 |
| Normal vs. Occlusion | 3670vs.3547 | 0.0113 |
| Stenosis vs. Occlusion | 3697vs.3547 | 0.2064 |
| Liposome |  |  |
| Normal vs. Stenosis | 3666vs.3741 | 0.1493 |
| Normal vs. Occlusion | 3666vs.3501 | 0.0325 |
| Stenosis vs. Occlusion | 3741vs.3501 | 0.0538 |

The numbers in the column of Mean are the average number of NP binding.


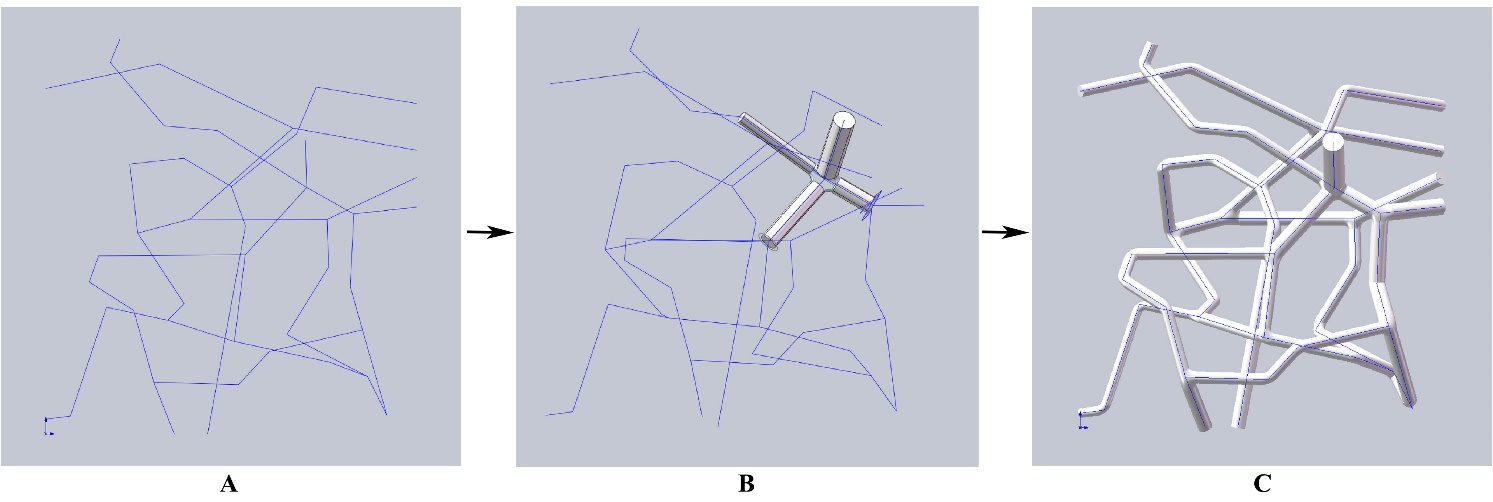


Supplemental Figure 1: Construction of microvascular networks. Microvascular network skeleton (A). Construct two adjacent cylindrical blood vessel segments and connect them through curved surfaces (B). The entire microvascular network (C).


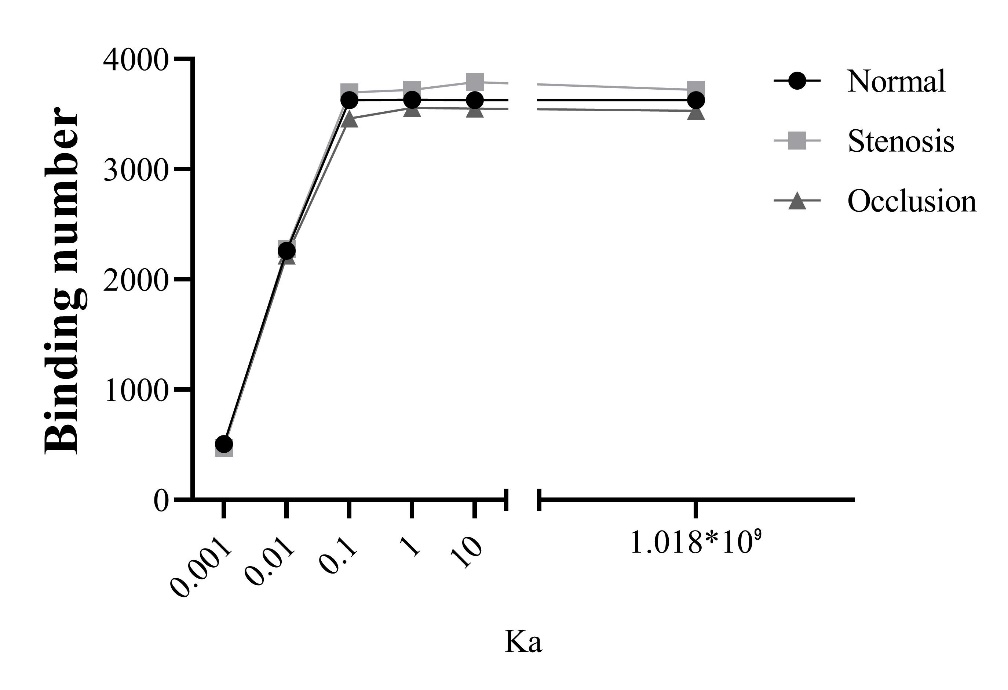


Supplemental Figure 2: The effect of different values on NP binding.
